# Supplementary material for: Sea ice reduction in the Barents-Kara Sea enhances June precipitation in the Yangtze River basin
Source: Copernicus journal article supplement (doi:10.5194/egusphere-2024-2417), 2024-09-18
Supplement: Supplementary file [file egusphere-2024-2417-AC3-supplement.pdf]

**Reply to Reviewer #3:**

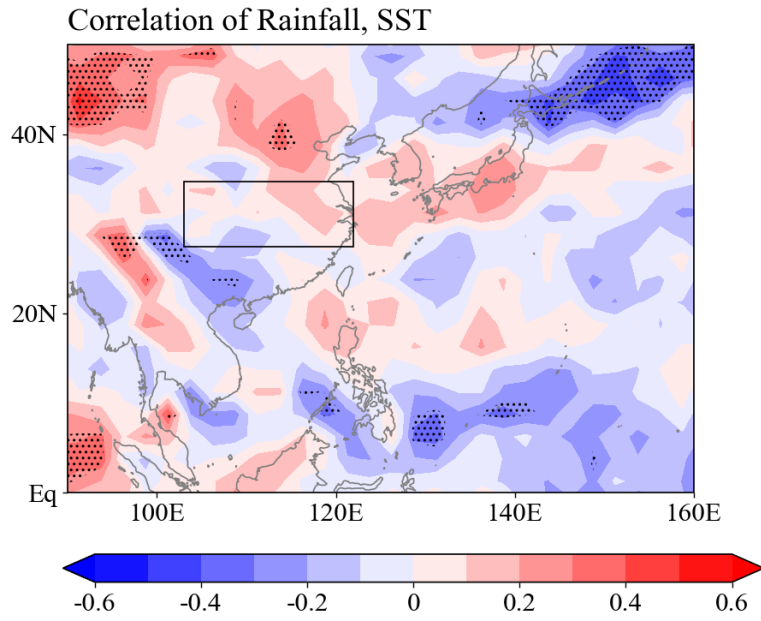

**Fig. R1** Same as Fig. 2a, but for July.
